# Supplementary material for: Worldwide variations in artificial skyglow
Source: PubMed Central journal article supplement (PMC5389131; doi:10.1038/srep08409), 2015-02-12

# Supplemental Information

## Worldwide variations in artificial skyglow

Christopher C. M. Kyba<sup>1,2,3,\*</sup>, Kai Pong Tong<sup>4</sup>, Jonathan Bennie<sup>5</sup>, Ignacio Birriel<sup>6</sup>, Jennifer J. Birriel<sup>6</sup>, Andrew Cool<sup>7</sup>, Arne Danielsen<sup>8</sup>, Thomas W. Davies<sup>5</sup>, Peter N. den Outer<sup>9</sup>, William Edwards<sup>8</sup>, Rainer Ehlert<sup>8</sup>, Fabio Falchi<sup>10</sup>, Jürgen Fischer<sup>2</sup>, Andrea Giacomelli<sup>11</sup>, Francesco Giubbilini<sup>11</sup>, Marty Haaima<sup>9</sup>, Claudia Hesse<sup>11</sup>, Georg Heygster<sup>4</sup>, Franz Hölker<sup>1</sup>, Richard Inger<sup>5</sup>, Linsey J. Jensen<sup>13,14</sup>, Helga U. Kuechly<sup>1</sup>, John Kuehn<sup>8</sup>, Phil Langill<sup>15</sup>, Dorien E. Lolkema<sup>9</sup>, Matthew Nagy<sup>16</sup>, Miguel Nieves<sup>17</sup>, Nobuaki Ochi<sup>18</sup>, Emil Popow<sup>19</sup>, Thomas Posch<sup>20</sup>, Johannes Puschnig<sup>20</sup>, Thomas Ruhtz<sup>2</sup>, Wim Schmidt<sup>21</sup>, Robert Schwarz<sup>19</sup>, Axel Schwöpe<sup>19</sup>, Henk Spoelstra<sup>22</sup>, Anthony Tekatch<sup>23</sup>, Mark Trueblood<sup>24</sup>, Constance E. Walker<sup>13</sup>, Michael Weber<sup>19</sup>, Douglas L. Welch<sup>25</sup>, Jaime Zamorano<sup>17</sup>, Kevin J. Gaston<sup>5</sup>

<sup>1</sup> Leibniz Institute for Freshwater Ecology and Inland Fisheries

<sup>2</sup> Institute for Space Sciences, Freie Universität Berlin, Berlin, Germany

<sup>3</sup> Deutsches GeoForschungsZentrum Potsdam, Potsdam, Germany

<sup>4</sup> Institut für Umweltphysik, Universität Bremen, Bremen, Germany

<sup>5</sup> Environment and Sustainability Institute, University of Exeter, Penryn, UK

<sup>6</sup> Morehead State University, Morehead, USA

<sup>7</sup> The Heights Observatory, Adelaide

<sup>8</sup> Unaffiliated Citizen Scientist

<sup>9</sup> National Institute for Public Health and the Environment, Bilthoven, The Netherlands

<sup>10</sup> Light Pollution Science and Technology Institute (ISTIL), Thiene, Italy

<sup>11</sup> Attivarti.org, Toriola, Italy

<sup>12</sup> Landesamt für Umwelt, Gesundheit und Verbraucherschutz Brandenburg, Germany

<sup>13</sup> National Optical Astronomy Observatory, Tucson, USA

<sup>14</sup> Utah State University, Logan, USA

<sup>15</sup> Rothney Astrophysical Observatory, University of Calgary, Calgary, Canada

<sup>16</sup> Department of Physics, University of Alberta, Edmonton, Canada

<sup>17</sup> Departamento de Astrofísica y Ciencias de la Atmósfera, Universidad Complutense de Madrid, Madrid, Spain

<sup>18</sup> Faculty of Business Administration, Toyo University, Tokyo, Japan

<sup>19</sup> Leibniz Institut für Astrophysik Potsdam (AIP), Potsdam, Germany

<sup>20</sup> Institut für Astrophysik, Vienna, Austria

<sup>21</sup> Sotto le Stelle, Utrecht, The Netherlands

<sup>22</sup> Lumineux Consult, Arnhem, The Netherlands

<sup>23</sup> Unihedron, Grimsby, Canada

<sup>24</sup> Winer Observatory, Sonoita, USA

<sup>25</sup> Department of Physics and Astronomy, McMaster University, Hamilton, Canada

\* E-mail: kyba@gfz-potsdam.de

Page 3: Supplemental Table S1 shows the location information for the 50 sites. In two cases (Deerlick and Steglitz, Berlin), sky brightness was measured by two SQMs. The sites are ordered by increasing observed sky brightness.

Page 4: Supplemental Table S2 shows the detailed information about the sites, including their physical location (latitude, longitude, and elevation), as well as information about the instrument uptime. Table columns 2011 and 2012 indicate the percentage of time during the study period for which the instruments were online. The column labeled “Up (%)” shows the ratio between the time online and the intended time online (e.g. Site 1 was only installed midway through the second measurement period, and consistently delivered data through this period).

Page 5: Supplemental Table S3 shows the summary of night sky observations during the measurement period. The column “data points” shows how many minute-by-minute observations were made under conditions of astronomical night within 15 minutes of midnight (as defined in the text). The column “WA” indicates the prediction for the clear sky brightness in  $\text{mag}/\text{arcsec}^2$  by [20] for sites in North America and Europe. “Clear” and “overcast” indicate the sky radiance (in  $\text{mag}_{SQM}/\text{arcsec}^2$ ) under these conditions; values marked with a \* did not have SYNOP data, and the clear and overcast values are the 28<sup>th</sup> and 81<sup>st</sup> percentiles. The “brightening factor” indicates the linear ratio of overcast to clear sky radiance for sites which had SYNOP data. The 22 → 24 and 24 → 02 columns show the change in clear sky radiance between the given times. Sites 46-52 are not used in the analysis due to instrumental problems (see methods).

Page 6: Supplemental Table S4 shows the difference in overcast sky radiance at midnight (8 okta) nights for nights with the moon below or above the horizon.

Page 7: Supplemental Table S5 shows the variation in sky radiance on clear and cloudy midnights. Only sites with both SYNOP observations and both clear and overcast (8 okta) data are included.

Page 7: Supplemental Table S6 shows the variation in sky radiance on moonlit and moon-free overcast midnights. Only sites with SYNOP data, at least 40 observations, and data on both moonlit and moon-free nights are shown.

Pages 8-11: Supplemental Figure S7 is a composite figure showing the relationship between lunar elevation and sky radiance on overcast nights. Only sites with SYNOP data, at least 40 observations, and data on both moonlit and moon-free nights are shown.

Pages 12-18: Supplemental Figure S8 is a composite figure showing the observed change in sky radiance (in  $\text{mag}_{SQM}/\text{arcsec}^2$ ) over the course of the night on moon-free nights for each of the 50 sites.

Page 19: Supplemental Figure S9 is a histogram showing the observed change in median sky radiance from 22:00 to midnight on a linear scale. Values larger than unity indicate that a site becomes brighter as the night progresses. Only sites with SYNOP data and midnight clear sky radiances brighter than  $20.85 \text{ mag}_{SQM}/\text{arcsec}^2$  ( $\sim 2$  NSU) are analyzed.

Page 19: Supplemental Figure S10 is a histogram showing the observed change in median sky radiance from midnight to 02:00 on a linear scale. Values larger than unity indicate that a site becomes brighter as the night progresses. Only sites with SYNOP data and midnight clear sky radiances brighter than  $20.85 \text{ mag}_{SQM}/\text{arcsec}^2$  ( $\sim 2$  NSU) are analyzed.

Supplemental Table S11 contains the entire dataset, and can be downloaded separately from the publisher’s website. The data format is as follows:

Site number: location  
Year (UTC time)  
Month (UTC time)  
Day (UTC time)  
Hour (UTC time)  
Minute (UTC time)  
Hours after local midnight  
Solar elevation angle  
Lunar elevation angle  
Number of observations in 1-minute interval  
Observed radiance in  $\text{mag}_{SQM}/\text{arcsec}^2$  (Corrected for window attenuation)

**Supplemental Table S1: Site designations**

| N  | Site name                | Description                                                     | Loc |
|----|--------------------------|-----------------------------------------------------------------|-----|
| 1  | Tucson KP                | Kitt Peak, Tucson, AZ                                           | US  |
| 2  | Schiermnk                | Schiermonnikoog                                                 | NL  |
| 3  | Veinto Rg                | Veinto Ridge, Silver City, NM                                   | US  |
| 4  | Tucson Hpk               | Mount Hopkins, Tucson AZ                                        | US  |
| 5  | Winer                    | Winer Observatory, Sonoita, AZ                                  | US  |
| 6  | Alice Sp                 | Alice Springs                                                   | AU  |
| 7  | IP Feld                  | Westhavelland, Brandenburg                                      | DE  |
| 8  | Tucson Lm                | Mount Lemmon, Tucson, AZ                                        | US  |
| 9  | Parey                    | Parey, Brandenburg                                              | DE  |
| 10 | Tenerife                 | STELLA Robotic Observatory, Izana, Tenerife                     | ES  |
| 11 | Springendal              | Springendal, Hezingen                                           | NL  |
| 12 | Rad Kwk                  | Radio Kootwijk                                                  | NL  |
| 13 | Seebergen                | Seebergen, Lilienthal                                           | DE  |
| 14 | Tucson W                 | Tucson West, AZ                                                 | US  |
| 15 | Calgary RAO              | Rothney Astrophysical Observatory Calgary                       | CA  |
| 16 | Vitto Veneto             | Central Vittorio Veneto                                         | IT  |
| 17 | Arkemheen                | Arkemheen                                                       | NL  |
| 18 | CESAR                    | CESAR, Cabauw                                                   | NL  |
| 19 | Potsdam Bb               | Babelsberg, Potsdam                                             | DE  |
| 20 | Arnhem                   | Arnhem                                                          | NL  |
| 21 | Vestby                   | Vestby                                                          | NO  |
| 22 | Lendinara                | Lendinara                                                       | IT  |
| 23 | Berlin Sd                | Schulzendorf, Berlin                                            | DE  |
| 24 | Tucson N                 | Tucson North, AZ                                                | US  |
| 25 | Grimsby                  | Grimsby, ON                                                     | CA  |
| 26 | Met Monte                | MeteoMontebello                                                 | IT  |
| 27 | Castigli                 | Castiglioncello                                                 | IT  |
| 28 | Nove                     | Nove                                                            | IT  |
| 29 | Bremen H-L               | Horn-Lehe, Bremen                                               | DE  |
| 30 | Morehead                 | Morehead, KY                                                    | US  |
| 31 | Hamilton                 | Hamilton, ON                                                    | CA  |
| 32 | Berlin St LE             | Steglitz, Berlin (SQM-LE)                                       | DE  |
| 33 | Berlin St LU             | Steglitz, Berlin (SQM-LU)                                       | DE  |
| 34 | Adelaide                 | Adelaide                                                        | AU  |
| 35 | Tucson E                 | Tucson East, AZ                                                 | US  |
| 36 | Tucson C                 | Tucson Center, AZ                                               | US  |
| 37 | Utrecht                  | Utrecht                                                         | NL  |
| 38 | Vienna IFA               | Institute of Astronomy, University of Vienna                    | AT  |
| 39 | Schipluiden              | Schipluiden                                                     | NL  |
| 40 | Plymouth Dv              | Plymouth University, Plymouth                                   | UK  |
| 41 | Tucson S                 | Tucson South, AZ                                                | US  |
| 42 | Berlin HM                | Hackescher Markt, Berlin                                        | DE  |
| 43 | Madrid UCM               | Universidad Complutense de Madrid, Madrid                       | ES  |
| 44 | Edmonton                 | Edmonton, AB                                                    | CA  |
| 45 | Vlaardingen              | Vlaardingen                                                     | NL  |
| 46 | Yonago <sup>¶</sup>      | Yonago                                                          | JP  |
| 47 | Mexico <sup>¶</sup>      | San Luis Potosì                                                 | MX  |
| 48 | Plymouth Rm <sup>†</sup> | Ramehead, Torpoint, Cornwall                                    | UK  |
| 49 | Plymouth Mk <sup>†</sup> | Looe, Cornwall                                                  | UK  |
| 50 | FOA Schöpfl <sup>‡</sup> | Leopold-Figl-Observatorium für Astrophysik, Mt. Mitterschöpfung | AT  |
| 51 | Deerlick 1 <sup>§</sup>  | Deerlick Astronomical Village, Crawfordville, GA (Station 1)    | US  |
| 52 | Deerlick 2 <sup>§</sup>  | Deerlick Astronomical Village, Crawfordville, GA (Station 2)    | US  |

<sup>¶</sup> Window attenuation unknown

<sup>†</sup> Thresholding problem

<sup>‡</sup> Instrument failure under dark skies.

<sup>§</sup> Instrument failure

**Supplemental Table S2: Detailed site information**

| N  | Site name                | Loc | Class    | Lat (°N) | Lon (°E) | Elev (m) | 2011 | 2012  | Up (%) |
|----|--------------------------|-----|----------|----------|----------|----------|------|-------|--------|
| 1  | Tucson KP                | US  | rural    | 31.96    | -111.60  | 2065     | N/A  | 74.4  | 99.3   |
| 2  | Schiermnk                | NL  | rural    | 53.48    | 6.20     | 7        | 37.3 | 93.0  | 67.7   |
| 3  | Veinto Rg                | US  | rural    | 32.77    | -108.33  | 1936     | 81.7 | N/A   | 81.7   |
| 4  | Tucson Hpk               | US  | rural    | 31.68    | -110.88  | 2335     | N/A  | 68.0  | 88.7   |
| 5  | Winer                    | US  | rural    | 31.67    | -110.60  | 1516     | 27.7 | 15.5  | 30.8   |
| 6  | Alice Sp                 | AU  | rural    | -23.50   | 133.84   | 718      | 99.8 | N/A   | 99.8   |
| 7  | IP Feld                  | DE  | rural    | 52.70    | 12.46    | 27       | N/A  | 91.0  | 91.0   |
| 8  | Tucson Lm                | US  | rural    | 32.44    | -110.79  | 2781     | N/A  | 66.4  | 89.1   |
| 9  | Parey                    | DE  | rural    | 52.68    | 12.25    | 36       | N/A  | 82.4  | 82.4   |
| 10 | Tenerife                 | ES  | rural    | 28.30    | -16.51   | 2380     | N/A  | 91.4  | 91.4   |
| 11 | Springendal              | NL  | rural    | 52.43    | 6.88     | 74       | 80.8 | 90.3  | 90.0   |
| 12 | Rad Kwk                  | NL  | rural    | 52.11    | 5.49     | 71       | 67.0 | 27.3  | 49.7   |
| 13 | Seebergen                | DE  | rural    | 53.14    | 8.99     | 11       | N/A  | 86.3  | 91.8   |
| 14 | Tucson W                 | US  | suburban | 32.24    | -111.08  | 856      | N/A  | 65.6  | 85.5   |
| 15 | Calgary RAO              | CA  | rural    | 50.87    | -114.29  | 1269     | N/A  | 19.0  | 19.0   |
| 16 | Vitto Veneto             | IT  | suburban | 46.01    | 12.31    | 500      | 6.2  | 34.0  | 20.1   |
| 17 | Arkemheen                | NL  | rural    | 52.25    | 5.43     | 4        | 75.6 | 89.8  | 87.2   |
| 18 | CESAR                    | NL  | rural    | 51.97    | 4.93     | 3        | 94.5 | 73.2  | 88.7   |
| 19 | Potsdam Bb               | DE  | suburban | 52.40    | 13.10    | 66       | 97.9 | 100.0 | 99.0   |
| 20 | Arnhem                   | NL  | suburban | 51.94    | 5.87     | 14       | 93.4 | 88.9  | 96.5   |
| 21 | Vestby                   | NO  | suburban | 59.60    | 10.76    | 84       | 96.7 | 99.8  | 66.5   |
| 22 | Lendinara                | IT  | suburban | 45.08    | 11.56    | 9        | 78.4 | 7.3   | 42.8   |
| 23 | Berlin Sd                | DE  | suburban | 52.36    | 13.59    | 50       | N/A  | 90.1  | 90.1   |
| 24 | Tucson N                 | US  | suburban | 32.32    | -111.89  | 863      | N/A  | 22.2  | 28.7   |
| 25 | Grimsby                  | CA  | suburban | 43.18    | -79.52   | 173      | 98.7 | 99.0  | 98.9   |
| 26 | Met Monte                | IT  | suburban | 45.47    | 11.35    | 212      | 72.7 | 96.1  | 84.4   |
| 27 | Castigli                 | IT  | suburban | 43.41    | 10.42    | 15       | 85.1 | N/A   | 85.1   |
| 28 | Nove                     | IT  | suburban | 45.71    | 11.68    | 87       | 56.0 | 94.1  | 75.1   |
| 29 | Bremen H-L               | DE  | suburban | 53.10    | 8.85     | 22       | N/A  | 79.9  | 79.9   |
| 30 | Morehead                 | US  | rural    | 38.19    | -83.44   | 243      | 11.0 | 55.0  | 11.0   |
| 31 | Hamilton                 | CA  | suburban | 43.27    | -79.96   | 99       | 98.6 | N/A   | 98.6   |
| 32 | Berlin St LE             | DE  | urban    | 52.46    | 13.31    | 91       | 81.7 | 1.4   | 42.7   |
| 33 | Berlin St LU             | DE  | urban    | 52.46    | 13.31    | 77       | 91.4 | 98.7  | 98.1   |
| 34 | Adelaide                 | AU  | rural    | -34.62   | 138.46   | 25       | N/A  | 40.6  | 40.6   |
| 35 | Tucson E                 | US  | suburban | 32.23    | -110.80  | 796      | N/A  | 23.4  | 29.9   |
| 36 | Tucson C                 | US  | urban    | 32.23    | -110.95  | 745      | N/A  | 66.8  | 84.6   |
| 37 | Utrecht                  | NL  | urban    | 52.08    | 5.11     | 6        | 69.0 | 89.3  | 54.6   |
| 38 | Vienna IFA               | AT  | suburban | 48.23    | 16.33    | 240      | N/A  | 95.6  | 95.6   |
| 39 | Schipluiden              | NL  | rural    | 51.99    | 4.28     | 1        | 88.3 | 87.4  | 92.9   |
| 40 | Plymouth Dv              | UK  | urban    | 50.37    | -4.14    | 36       | N/A  | 98.1  | 98.1   |
| 41 | Tucson S                 | US  | suburban | 32.11    | -110.96  | 784      | N/A  | 27.0  | 42.8   |
| 42 | Berlin HM                | DE  | urban    | 52.52    | 13.40    | 46       | N/A  | 90.0  | 90.0   |
| 43 | Madrid UCM               | ES  | urban    | 40.45    | -3.73    | 650      | N/A  | 46.5  | 46.5   |
| 44 | Edmonton                 | CA  | urban    | 53.53    | -113.53  | 695      | N/A  | 53.6  | 53.6   |
| 45 | Vlaardingen              | NL  | suburban | 51.91    | 4.32     | 4        | 61.7 | 88.5  | 79.6   |
| 46 | Yonago <sup>¶</sup>      | JP  | suburban | 35.46    | 133.29   | 24       | 49.8 | N/A   | 49.8   |
| 47 | Mexico <sup>¶</sup>      | MX  | urban    | 22.14    | -101.03  | 1950     | 93.6 | N/A   | 93.6   |
| 48 | Plymouth Rm <sup>†</sup> | UK  | rural    | 50.32    | -4.22    | 97       | N/A  | 68.3  | 68.3   |
| 49 | Plymouth Mk <sup>†</sup> | UK  | rural    | 50.37    | -4.41    | 134      | N/A  | 50.8  | 50.8   |
| 50 | FOA Schöpf <sup>‡</sup>  | AT  | rural    | 48.08    | 15.92    | 880      | N/A  | 100.0 | 100.0  |
| 51 | Deerlick 1 <sup>§</sup>  | US  | pristine | 33.56    | -82.76   | 192      | 39.6 | N/A   | 39.6   |
| 52 | Deerlick 2 <sup>§</sup>  | US  | pristine | 33.56    | -82.76   | 192      | 59.5 | 90.9  | 75.2   |

<sup>¶</sup> Window attenuation unknown

<sup>†</sup> Thresholding problem

<sup>‡</sup> Instrument failure under dark skies.

<sup>§</sup> Instrument failure

Supplemental Table S3: Sky brightness observations

| N  | Site name                | Data points | WA   | Clear | Overcast | Brightening factor | 22 → 24 | 24 → 02 |
|----|--------------------------|-------------|------|-------|----------|--------------------|---------|---------|
| 1  | Tucson KP                | 358         | 21.4 | 21.8* | 21.5*    | N/A                | N/A     | N/A     |
| 2  | Schiermnk                | 1053        | 21.3 | 21.3  | 21.6     | 0.7                | 0.05    | 0.11    |
| 3  | Veinto Rg                | 131         | 21.1 | 21.7* | 20.9*    | N/A                | N/A     | N/A     |
| 4  | Tucson Hpk               | 352         | 21.3 | 21.5* | 21.2*    | N/A                | N/A     | N/A     |
| 5  | Winer                    | 1022        | 21.4 | 21.6* | 21.4*    | N/A                | N/A     | N/A     |
| 6  | Alice Sp                 | 240         | N/A  | 21.5* | 21.5*    | N/A                | N/A     | N/A     |
| 7  | IP Feld                  | 91          | 21.3 | 21.3  | 21.5     | 0.9                | -0.03   | -0.01   |
| 8  | Tucson Lm                | 347         | 20.8 | 21.3* | 20.5*    | N/A                | N/A     | N/A     |
| 9  | Parey                    | 164         | 21.3 | 21.2  | 21.1     | 1.1                | 0.09    | 0.09    |
| 10 | Tenerife                 | 2265        | N/A  | 21.3* | 20.9*    | N/A                | N/A     | N/A     |
| 11 | Springendal              | 1933        | 20.4 | 21.1  | 20.6     | 1.6                | 0.10    | 0.00    |
| 12 | Rad Kwk                  | 1076        | 19.9 | 20.7  | 20.4     | 1.7                | 0.07    | 0.08    |
| 13 | Seebergen                | 758         | 20.2 | 20.8  | 19.3     | 7.4                | 0.35    | 0.07    |
| 14 | Tucson W                 | 334         | 19.5 | 20.4* | 18.4*    | N/A                | N/A     | N/A     |
| 15 | Calgary RAO              | 5           | 19.6 | 20.7* | 20.7*    | N/A                | N/A     | N/A     |
| 16 | Vitto Veneto             | 300         | 20.3 | 20.4* | 18.9*    | N/A                | N/A     | N/A     |
| 17 | Arkemheen                | 1963        | 19.9 | 20.4  | 19.0     | 4.5                | 0.02    | 0.08    |
| 18 | CESAR                    | 2009        | 19.8 | 20.3  | 19.1     | 3.9                | -0.03   | -0.06   |
| 19 | Potsdam Bb               | 2453        | 19.6 | 20.2  | 17.7     | 13.0               | 0.03    | 0.09    |
| 20 | Arnhem                   | 2115        | 19.6 | 20.1  | 17.9     | 9.3                | 0.03    | 0.11    |
| 21 | Vestby                   | 167         | 19.6 | 20.1  | 17.9     | 10.3               | -0.15   | 0.04    |
| 22 | Lendinara                | 453         | 20.3 | 20.1* | 19.3*    | N/A                | N/A     | N/A     |
| 23 | Berlin Sd                | 96          | 19.8 | 20.0  | 17.9     | 8.4                | 0.04    | 0.04    |
| 24 | Tucson N                 | 133         | 21.4 | 19.9* | 17.8*    | N/A                | N/A     | N/A     |
| 25 | Grimsby                  | 926         | 19.4 | 19.8* | 18.2*    | N/A                | N/A     | N/A     |
| 26 | Met Monte                | 839         | 20.0 | 19.7* | 18.1*    | N/A                | N/A     | N/A     |
| 27 | Castigli                 | 408         | 20.3 | 19.8* | 18.6*    | N/A                | N/A     | N/A     |
| 28 | Nove                     | 764         | 20.0 | 19.5  | 17.4     | 7.5                | 0.10    | 0.13    |
| 29 | Bremen H-L               | 796         | 19.3 | 19.6  | 17.1     | 12.0               | 0.57    | -0.04   |
| 30 | Morehead                 | 575         | 20.1 | 19.2  | 17.2     | 6.8                | N/A     | N/A     |
| 31 | Hamilton                 | 2315        | 18.9 | 19.2* | 17.0*    | N/A                | N/A     | N/A     |
| 32 | Berlin St LE             | 894         | 18.9 | 19.1  | 16.4     | 13.3               | 0.29    | 0.12    |
| 33 | Berlin St LU             | 2258        | 18.9 | 19.2  | 16.5     | 13.5               | 0.22    | 0.08    |
| 34 | Adelaide                 | 1119        | N/A  | 19.2* | 16.9*    | N/A                | N/A     | N/A     |
| 35 | Tucson E                 | 132         | 18.8 | 19.2* | 17.6*    | N/A                | N/A     | N/A     |
| 36 | Tucson C                 | 342         | 18.1 | 18.6* | 16.8*    | N/A                | N/A     | N/A     |
| 37 | Utrecht                  | 1136        | 19.1 | 19.0  | 16.6     | 9.2                | 0.04    | 0.11    |
| 38 | Vienna IFA               | 2272        | 18.8 | 19.0* | 16.6*    | N/A                | N/A     | N/A     |
| 39 | Schipluiden              | 2100        | 18.2 | 18.5  | 15.8     | 13.8               | -0.46   | -0.87   |
| 40 | Plymouth Dv              | 175         | 19.5 | 18.5  | 15.4     | 17.6               | N/A     | N/A     |
| 41 | Tucson S                 | 130         | 18.9 | 18.6* | 17.0*    | N/A                | N/A     | N/A     |
| 42 | Berlin HM                | 93          | 18.5 | 18.3  | 15.3     | 16.2               | 0.20    | 0.03    |
| 43 | Madrid UCM               | 832         | 17.4 | 18.1  | 17.7     | 1.5                | 0.20    | 0.05    |
| 44 | Edmonton                 | 57          | 17.2 | 18.1* | 16.3*    | N/A                | N/A     | N/A     |
| 45 | Vlaardingen              | 2030        | 18.7 | 17.2  | 16.0     | 3.2                | 0.13    | -0.25   |
| 46 | Yonago <sup>¶</sup>      | 217         | N/A  | 19.9* | 18.6*    | N/A                | N/A     | N/A     |
| 47 | Mexico <sup>¶</sup>      | 434         | 18.8 | 18.9* | 16.3*    | N/A                | N/A     | N/A     |
| 48 | Plymouth Rm <sup>†</sup> | 91          | 20.7 | 19.0  | 19.1     | 0.9                | N/A     | N/A     |
| 49 | Plymouth Mk <sup>†</sup> | 38          | 21.1 | 19.3  | 18.6     | 1.9                | N/A     | N/A     |
| 50 | FOA Schöpf <sup>‡</sup>  | 2330        | 21.0 | 20.6* | 20.3*    | N/A                | N/A     | N/A     |
| 51 | Deerlick 1 <sup>§</sup>  | 214         | 21.3 | 21.1  | 20.8     | 1.3                | N/A     | N/A     |
| 52 | Deerlick 2 <sup>§</sup>  | 3414        | 21.3 | 21.3  | 21.3     | 1.0                | N/A     | N/A     |

<sup>¶</sup> Window attenuation unknown

<sup>†</sup> Thresholding problem

<sup>‡</sup> Instrument failure under dark skies. Recent measurements with a properly functioning SQM give a clear sky radiance of 21.4 mags<sub>SQM</sub>/arcsec<sup>2</sup> and an overcast sky radiance of 20.3 mags<sub>SQM</sub>/arcsec<sup>2</sup>.

<sup>§</sup> Instrument failure

**Supplemental Table S4: Comparison of overcast moonless and moonlit midnight radiances. Unit:  $\text{mag}_{SQM}/\text{arcsec}^2$**

| Site name    | Moonless data points | Median | Moonlit data points | Median | Moon difference |
|--------------|----------------------|--------|---------------------|--------|-----------------|
| Schiermkn    | 478                  | 21.6   | 568                 | 18.9   | 2.7             |
| IP Feld      | 22                   | 21.5   | 21                  | 19.2   | 2.3             |
| Parey        | 38                   | 21.1   | 42                  | 19.1   | 2.0             |
| Springendal  | 784                  | 20.6   | 720                 | 18.5   | 2.1             |
| Rad Kwk      | 440                  | 20.4   | 369                 | 18.9   | 1.5             |
| Arkemheen    | 841                  | 19.0   | 722                 | 18.0   | 1.0             |
| CESAR        | 591                  | 19.1   | 680                 | 18.2   | 0.9             |
| Potsdam Bb   | 399                  | 17.7   | 420                 | 17.5   | 0.2             |
| Arnhem       | 1005                 | 17.9   | 665                 | 17.3   | 0.6             |
| Vestby       | 21                   | 17.9   | 46                  | 17.3   | 0.5             |
| Nove         | 40                   | 17.4   | 20                  | 17.2   | 0.2             |
| Bremen H-L   | 60                   | 17.1   | 30                  | 16.2   | 0.9             |
| Morehead     | 140                  | 17.2   | 251                 | 16.2   | 1.0             |
| Berlin St LE | 60                   | 16.4   | 210                 | 16.6   | 0.1             |
| Berlin St LU | 285                  | 16.5   | 330                 | 16.4   | 0.0             |
| Utrecht      | 351                  | 16.6   | 422                 | 16.4   | 0.2             |
| Schipluiden  | 762                  | 15.8   | 965                 | 15.6   | 0.2             |
| Plymouth Dv  | 52                   | 15.4   | 37                  | 15.2   | 0.2             |
| Madrid UCM   | 30                   | 17.7   | 90                  | 15.1   | 2.5             |
| Vlaardingen  | 702                  | 16.0   | 786                 | 15.8   | 0.1             |
| Plymouth Rm  | 44                   | 19.1   | 37                  | 18.4   | 0.7             |
| Plymouth Mk  | 12                   | 18.6   | 30                  | 18.2   | 0.4             |
| Deerlick 1   | 18                   | 20.8   | 25                  | 19.3   | 1.5             |
| Deerlick 2   | 382                  | 21.3   | 408                 | 18.5   | 2.8             |

**Supplemental Table S5: Spread of data in moon-free nights. Unit: mag<sub>SQM</sub>/arcsec<sup>2</sup>**

| Site name    | Clear 15.9% | Clear 84.1% | Clear difference | Overcast 15.9% | Overcast 84.1 % | Overcast difference |
|--------------|-------------|-------------|------------------|----------------|-----------------|---------------------|
| IP Feld      | 21.4        | 21.2        | 0.1              | 21.6           | 21.4            | 0.2                 |
| Parey        | 21.4        | 21.1        | 0.2              | 21.2           | 20.9            | 0.3                 |
| Springendal  | 21.2        | 21.0        | 0.2              | 21.0           | 20.1            | 0.9                 |
| Rad Kwk      | 20.8        | 20.7        | 0.1              | 21.0           | 19.6            | 1.4                 |
| Arkemheen    | 20.4        | 20.1        | 0.3              | 20.1           | 18.4            | 1.8                 |
| CESAR        | 20.4        | 19.8        | 0.5              | 19.6           | 18.5            | 1.1                 |
| Potsdam Bb   | 20.3        | 20.0        | 0.3              | 18.0           | 17.4            | 0.6                 |
| Arnhem       | 20.2        | 19.8        | 0.4              | 19.1           | 17.4            | 1.7                 |
| Nove         | 19.7        | 19.2        | 0.5              | 19.0           | 17.2            | 1.7                 |
| Berlin St LU | 19.3        | 19.0        | 0.3              | 17.1           | 16.2            | 0.9                 |
| Schipluiden  | 18.8        | 18.1        | 0.7              | 17.3           | 14.9            | 2.4                 |
| Vlaardingen  | 17.4        | 17.0        | 0.4              | 16.7           | 15.5            | 1.2                 |
| Deerlick 2   | 21.5        | 21.1        | 0.3              | 21.9           | 21.1            | 0.9                 |

**Supplemental Table S6: Spread of data in overcast nights. Unit: mag<sub>SQM</sub>/arcsec<sup>2</sup>**

| Site name    | Moonless 15.9% | Moonless 84.1% | Moonlit 15.9% | Moonlit 84.1 % |
|--------------|----------------|----------------|---------------|----------------|
| Schiermnk    | 21.9           | 21.3           | 20.3          | 17.0           |
| IP Feld      | 21.6           | 21.4           | 20.0          | 17.8           |
| Parey        | 21.2           | 20.9           | 20.1          | 17.9           |
| Springendal  | 21.0           | 20.1           | 19.8          | 17.3           |
| Rad Kwk      | 21.0           | 19.6           | 19.9          | 17.4           |
| Arkemheen    | 20.1           | 18.4           | 18.5          | 17.0           |
| CESAR        | 19.6           | 18.5           | 18.5          | 17.2           |
| Potsdam Bb   | 18.0           | 17.4           | 18.0          | 17.2           |
| Arnhem       | 19.1           | 17.4           | 17.8          | 17.0           |
| Vestby       | 18.2           | 17.0           | 18.8          | 16.7           |
| Nove         | 19.0           | 17.2           | 17.4          | 16.7           |
| Bremen H-L   | 17.1           | 17.0           | 16.3          | 16.1           |
| Morehead     | 17.7           | 16.1           | 17.9          | 15.7           |
| Berlin St LE | 16.5           | 16.4           | 17.2          | 16.2           |
| Berlin St LU | 17.1           | 16.2           | 17.0          | 16.2           |
| Utrecht      | 17.8           | 16.2           | 17.0          | 16.0           |
| Schipluiden  | 17.3           | 14.9           | 16.2          | 15.0           |
| Plymouth Dv  | 17.5           | 14.6           | 16.5          | 14.6           |
| Madrid UCM   | 17.9           | 17.0           | 16.2          | 14.8           |
| Vlaardingen  | 16.7           | 15.5           | 16.3          | 15.5           |
| Plymouth Rm  | 19.5           | 18.8           | 19.1          | 17.1           |
| Plymouth Mk  | 19.5           | 16.7           | 19.1          | 17.5           |
| Deerlick 1   | 21.2           | 20.7           | 21.0          | 17.4           |
| Deerlick 2   | 21.9           | 21.1           | 20.5          | 17.5           |

**Supplemental Figure S7: Contour plots for midnight cloudy sky radiance at different moon elevations, page 1 of 4**

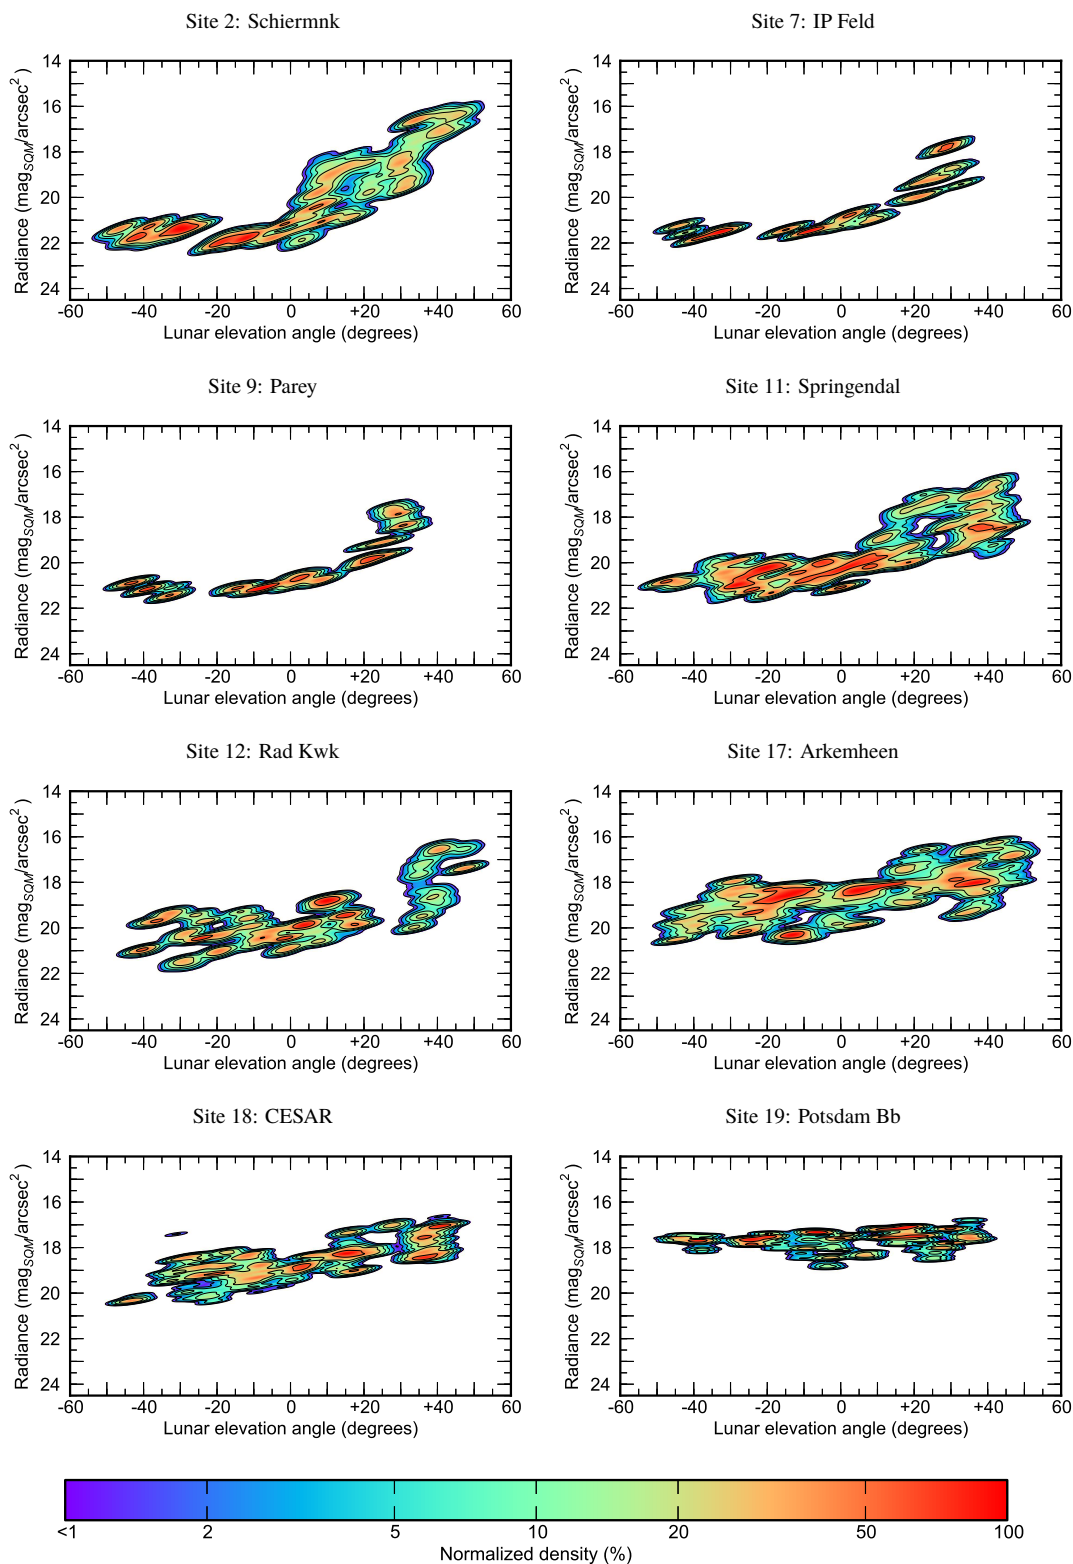



**Supplemental Figure S7: Contour plots for midnight cloudy sky radiance at different Moon elevations, page 2 of 4**

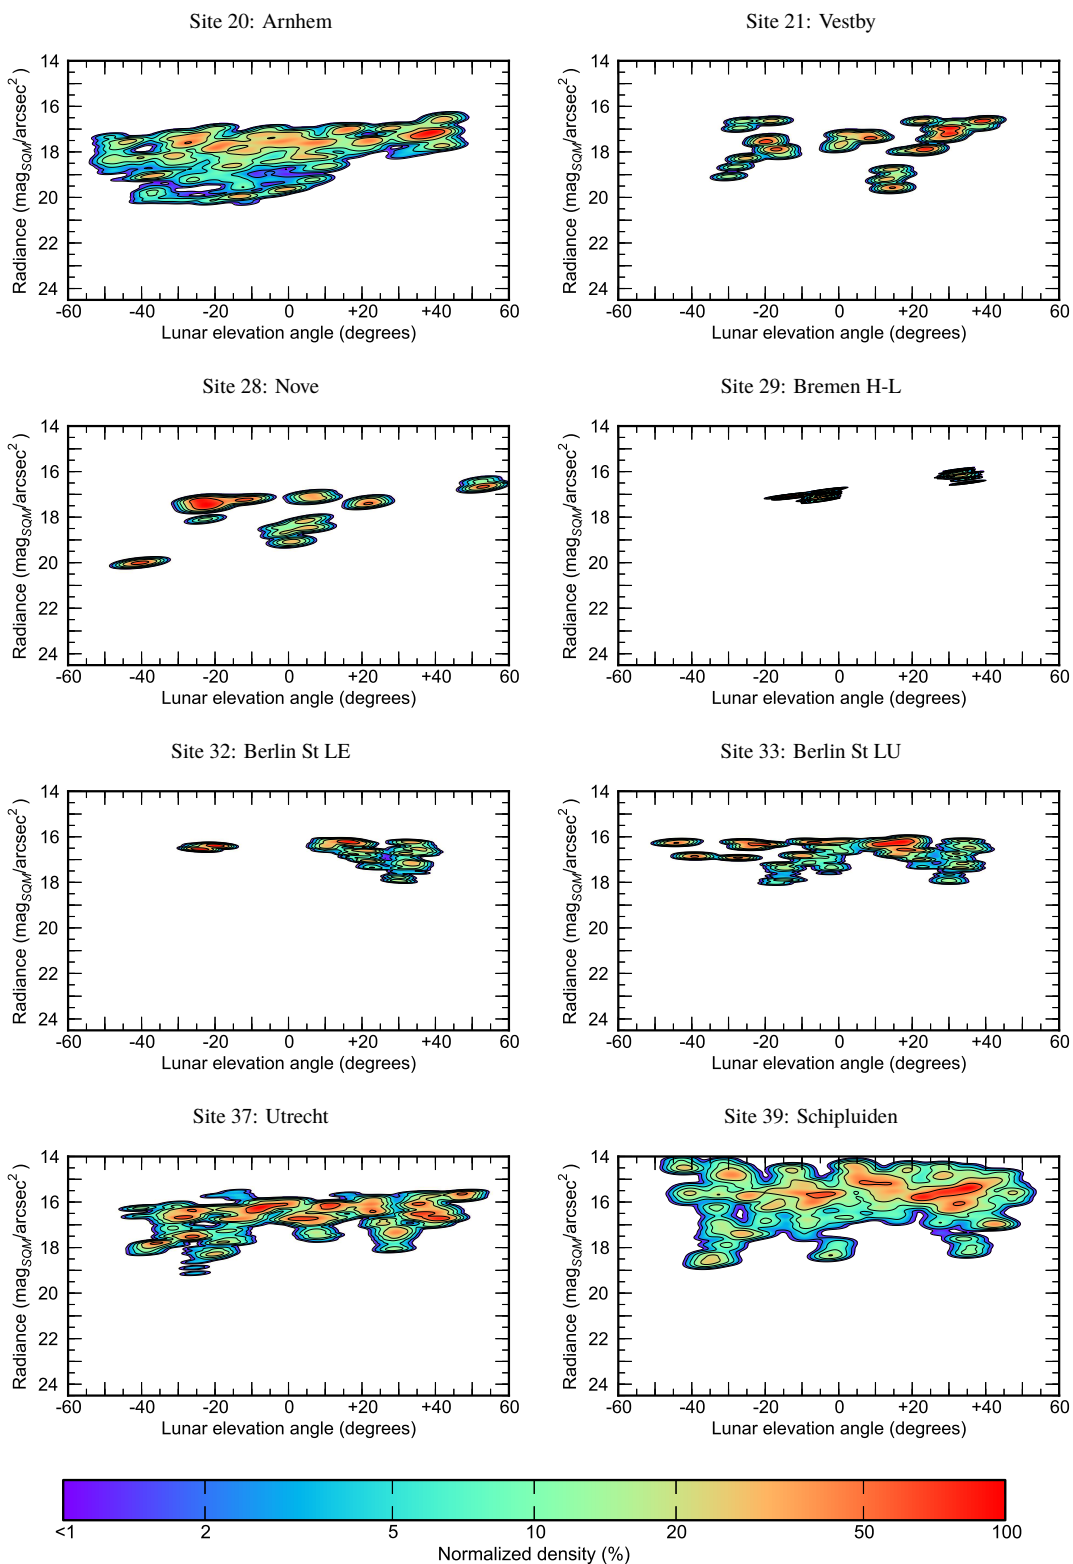

Supplemental Figure S7: Contour plots for midnight cloudy sky radiance at different moon elevations, page 3 of 4

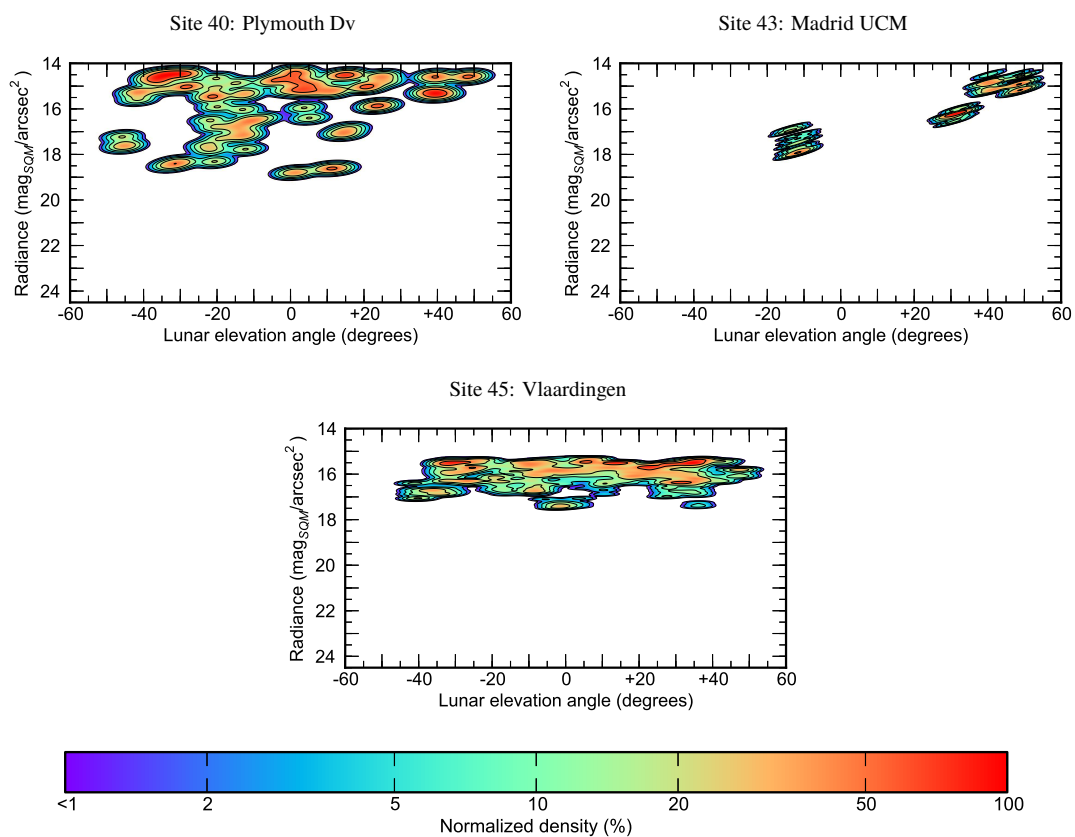

**Supplemental Figure S7: Contour plots for midnight cloudy sky radiance at different moon elevations, page 4 of 4**

Sites not included in analysis

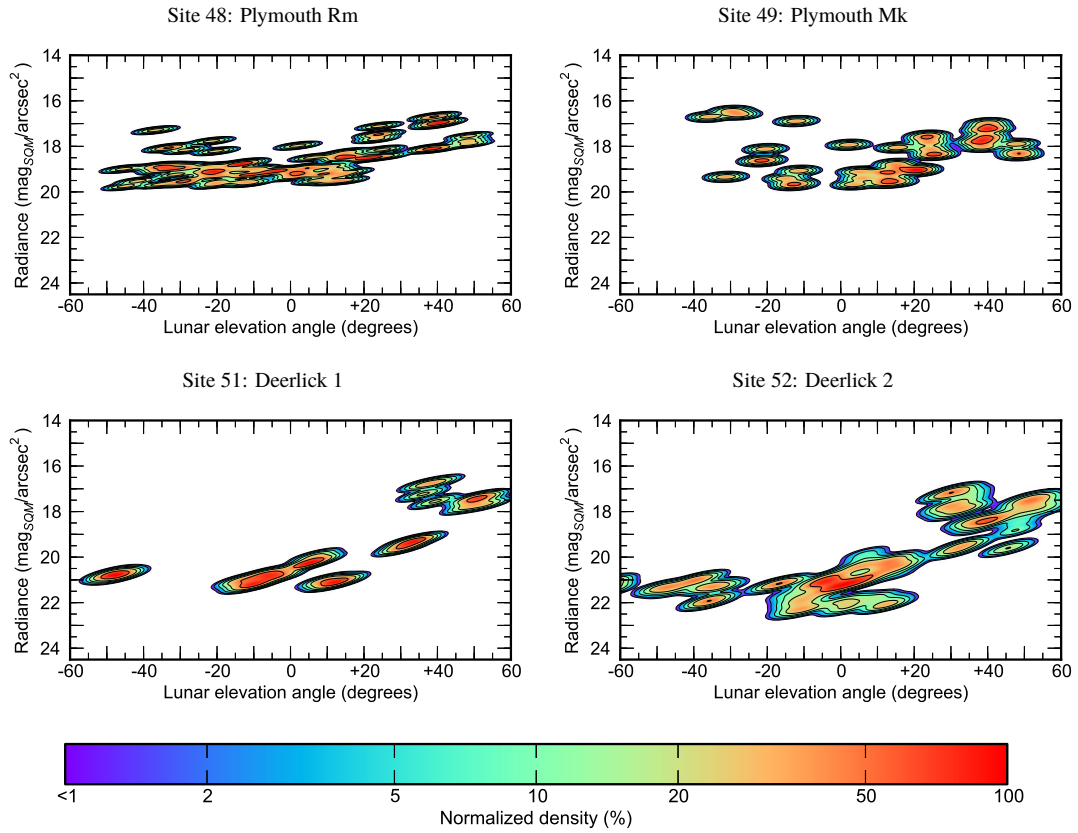

**Supplemental Figure S8: Evolution of night sky radiance over the course of the night for each site, page 1 of 7**

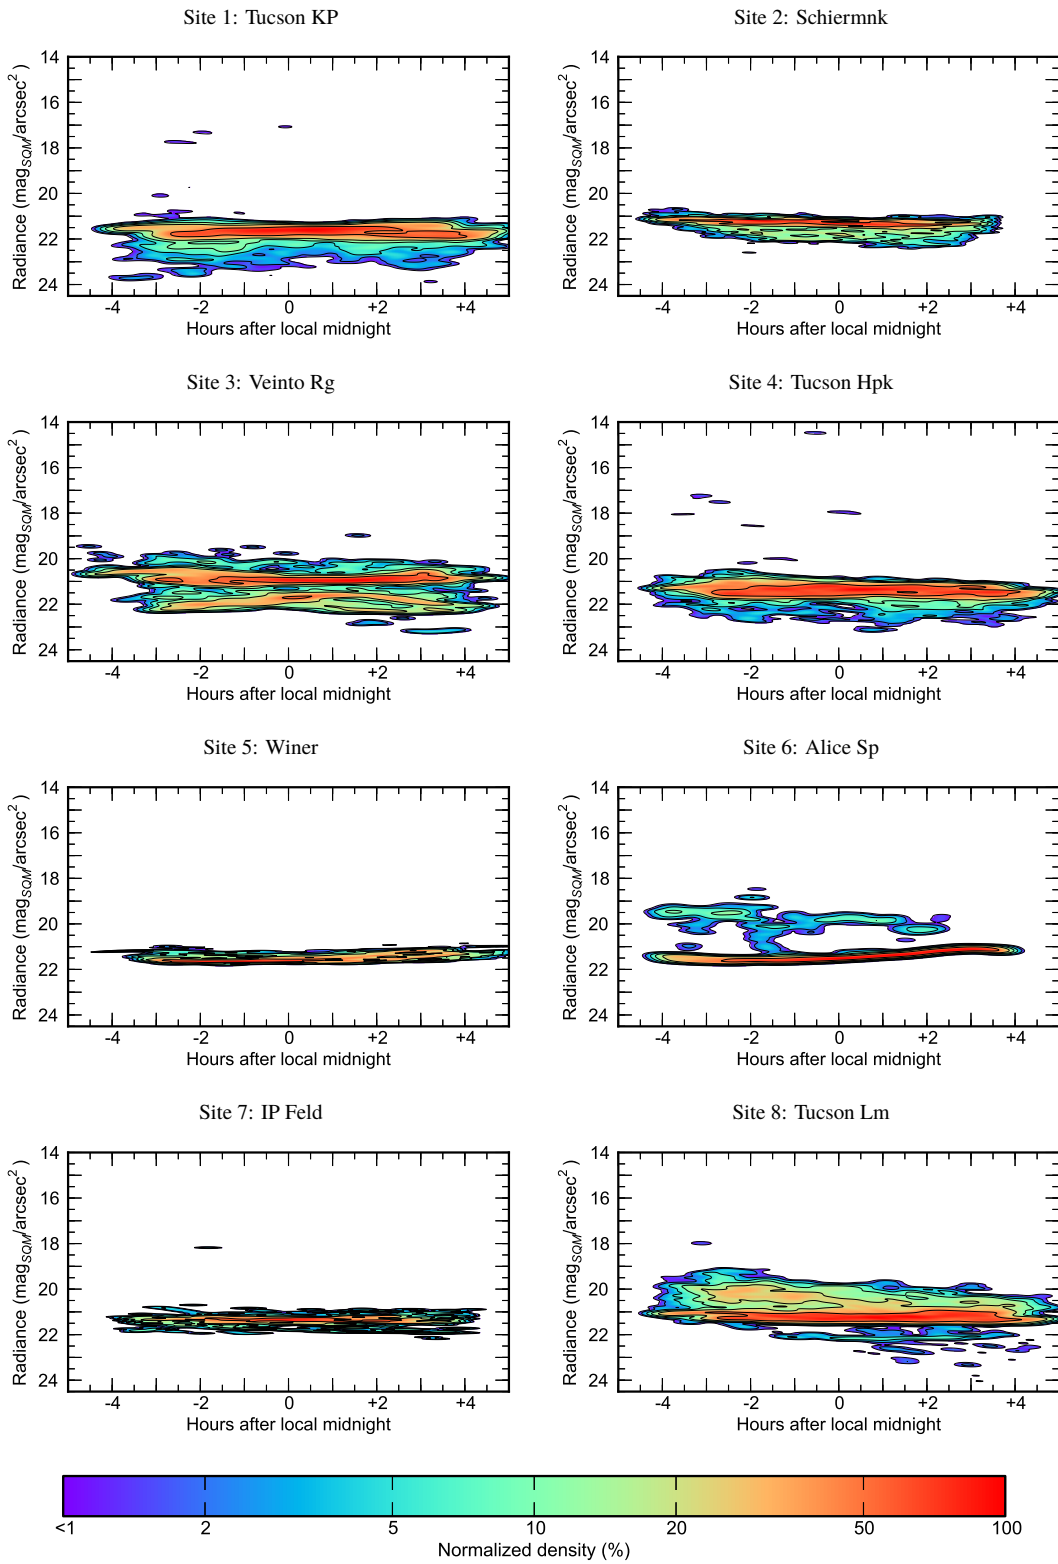

**Supplemental Figure S8: Evolution of night sky radiance over the course of the night for each site, page 2 of 7**

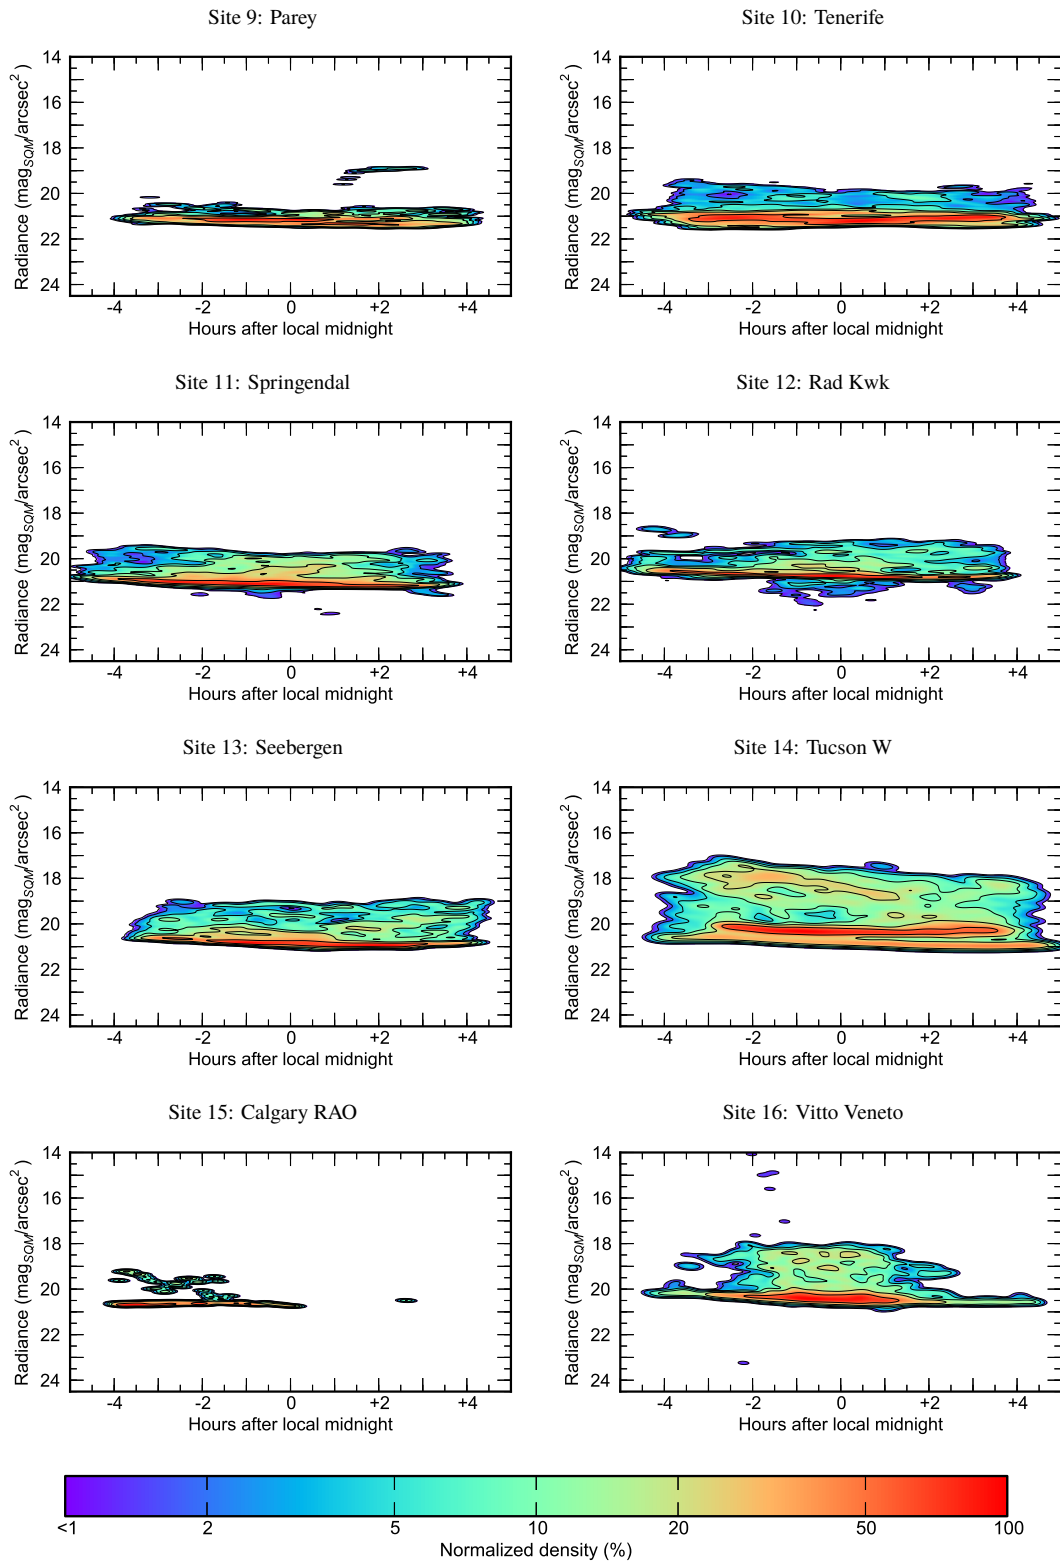

**Supplemental Figure S8: Evolution of night sky radiance over the course of the night for each site, page 3 of 7**

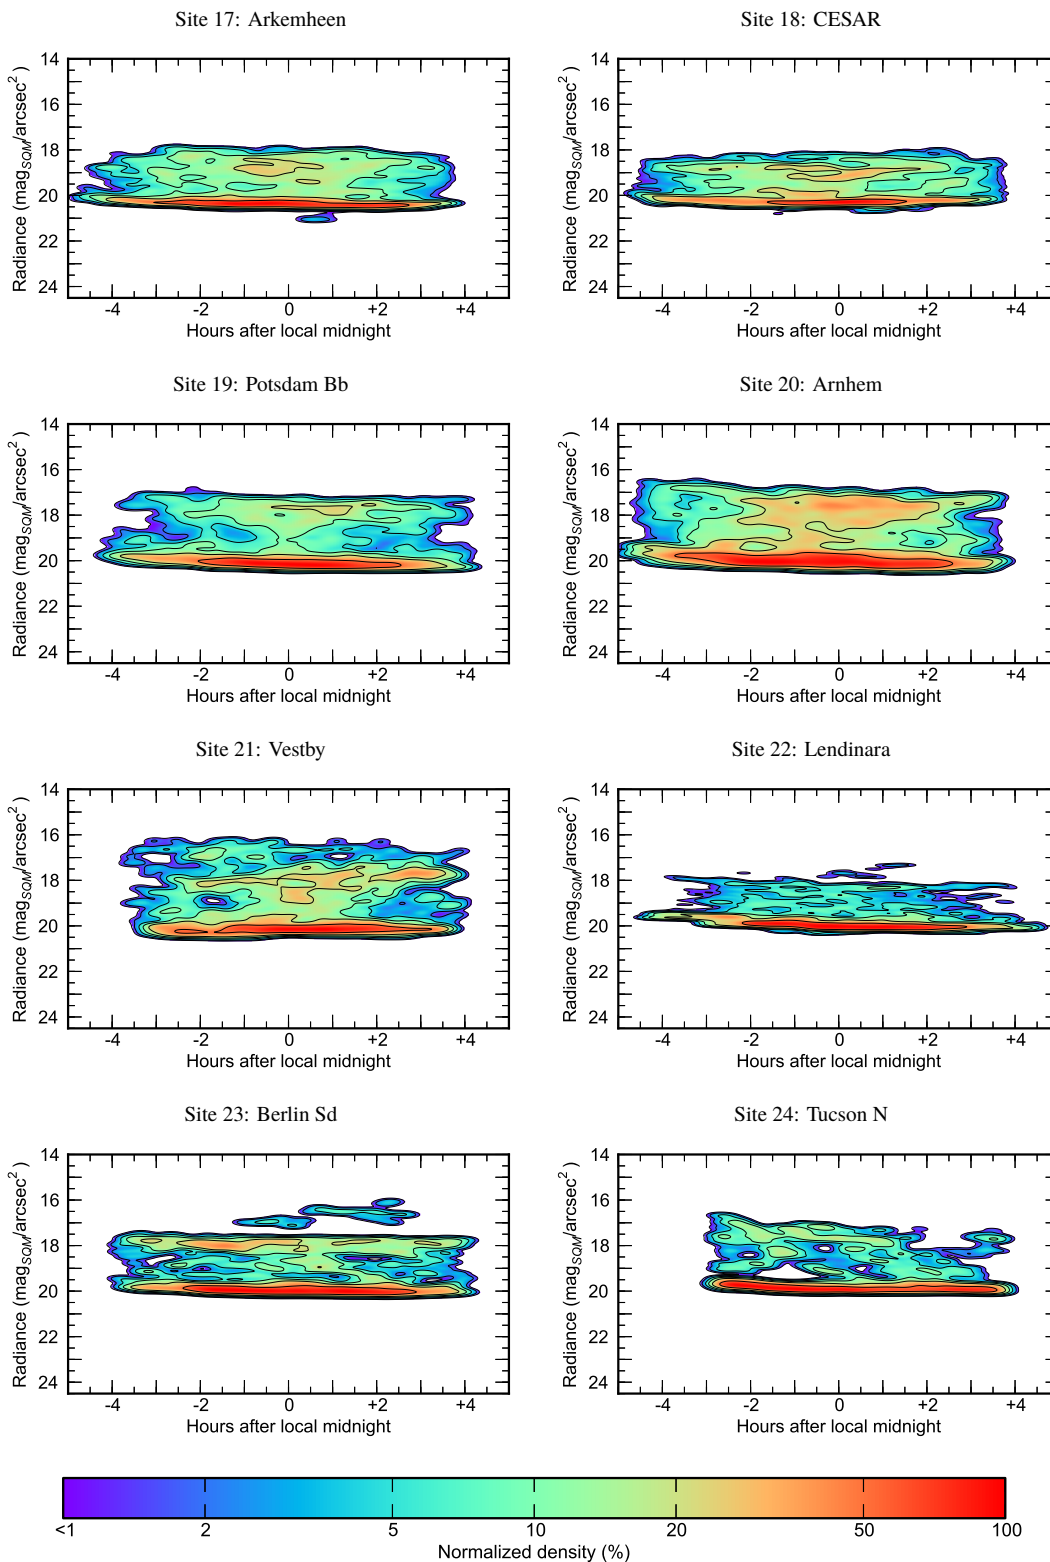

**Supplemental Figure S8: Evolution of night sky radiance over the course of the night for each site, page 4 of 7**

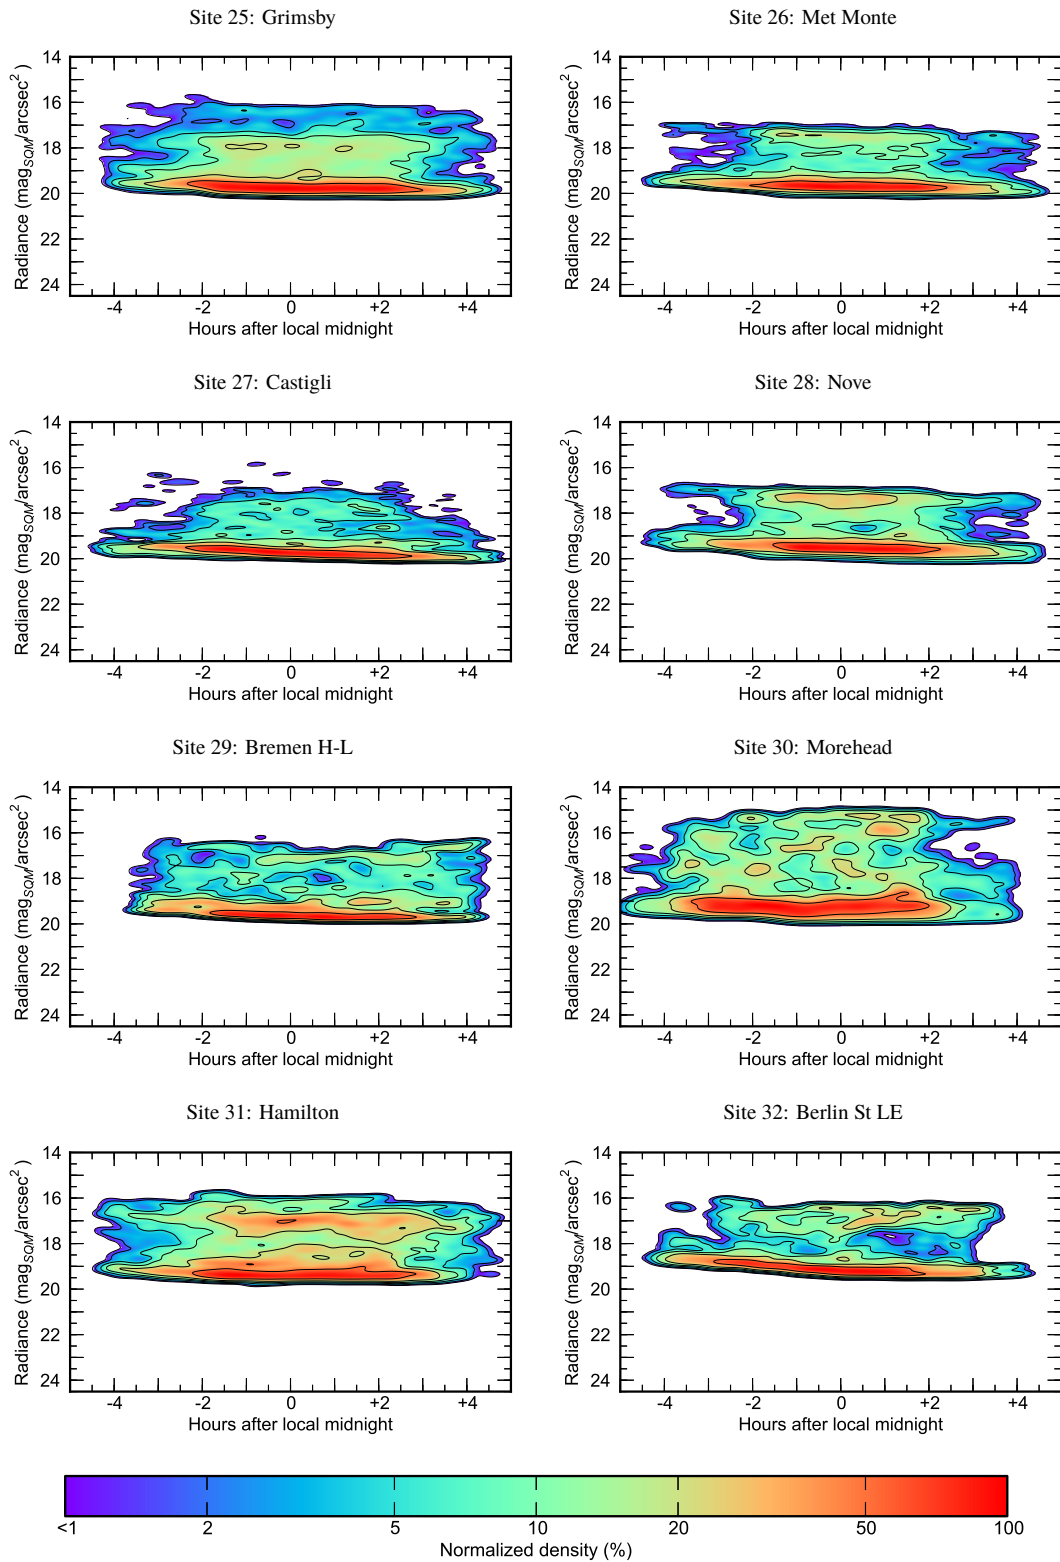

**Supplemental Figure S8: Evolution of night sky radiance over the course of the night for each site, page 5 of 7**

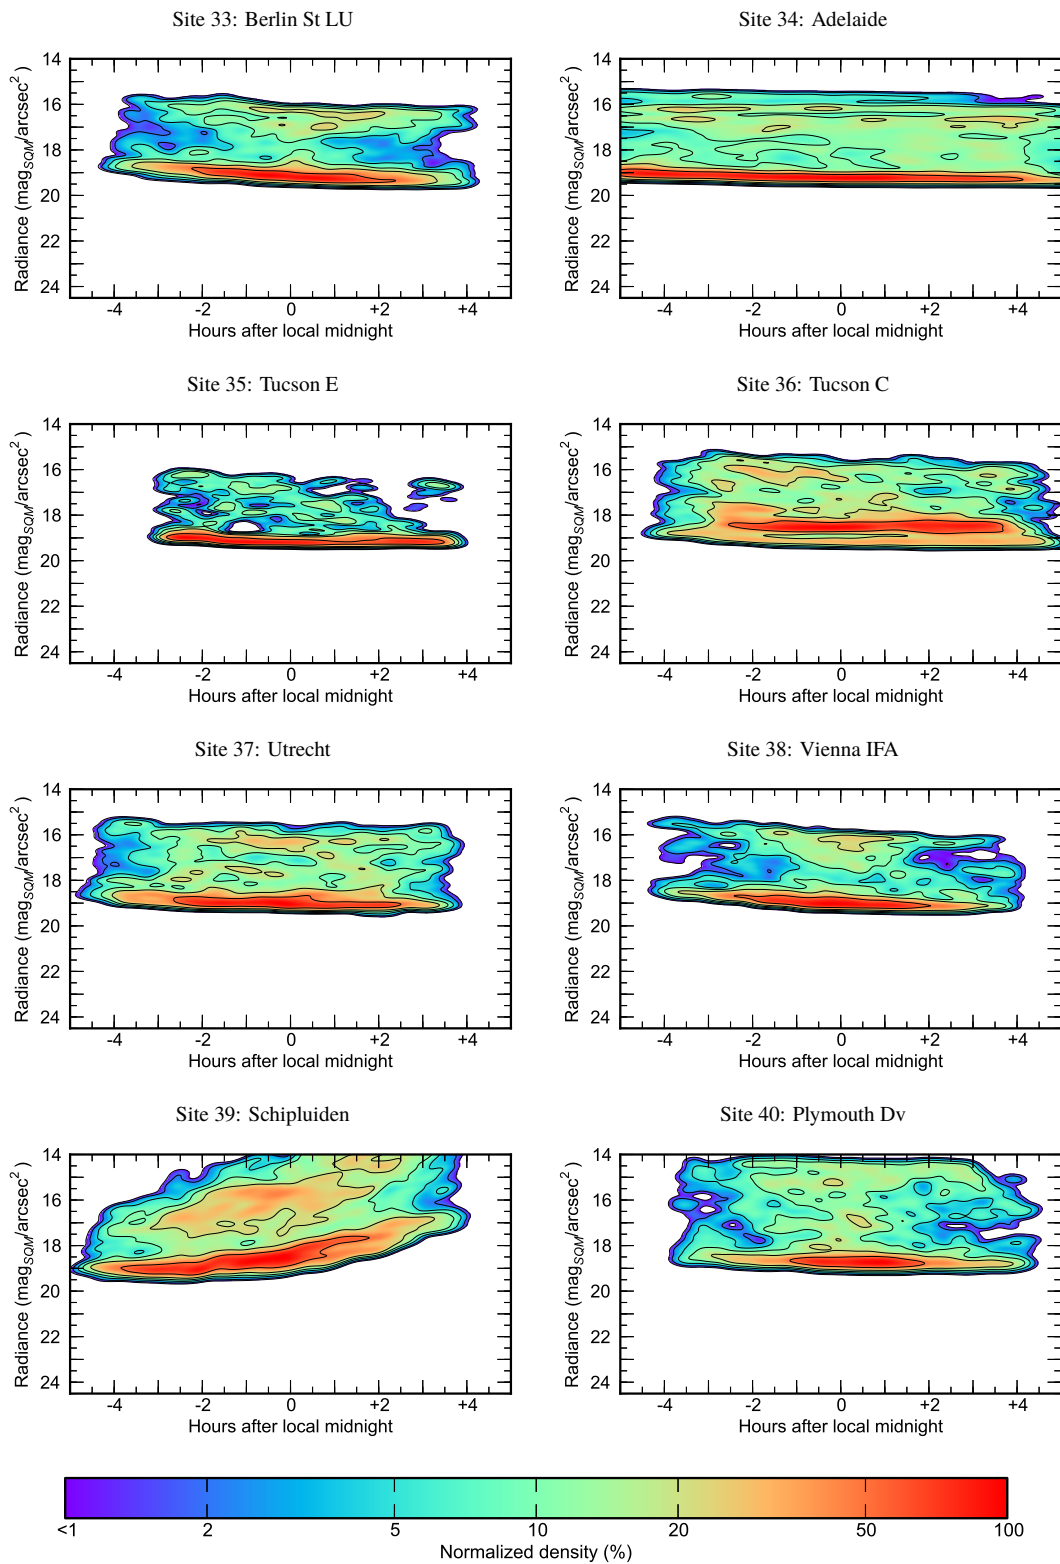



Supplemental Figure S8: Evolution of night sky radiance over the course of the night for each site, page 6 of 7

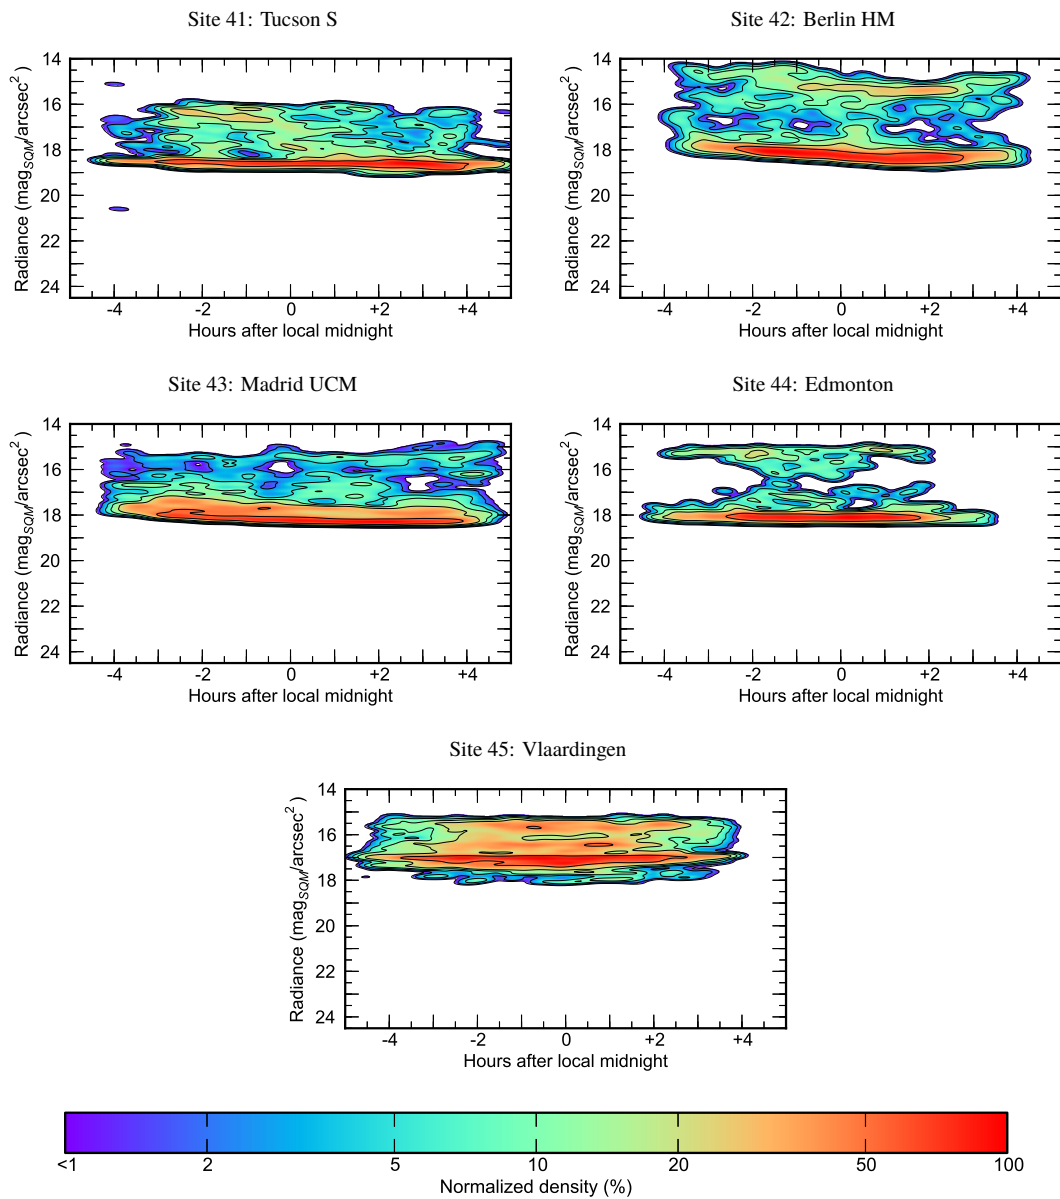

Supplemental Figure S8: Evolution of night sky radiance over the course of the night for each site, page 7 of 7

Sites not included in analysis

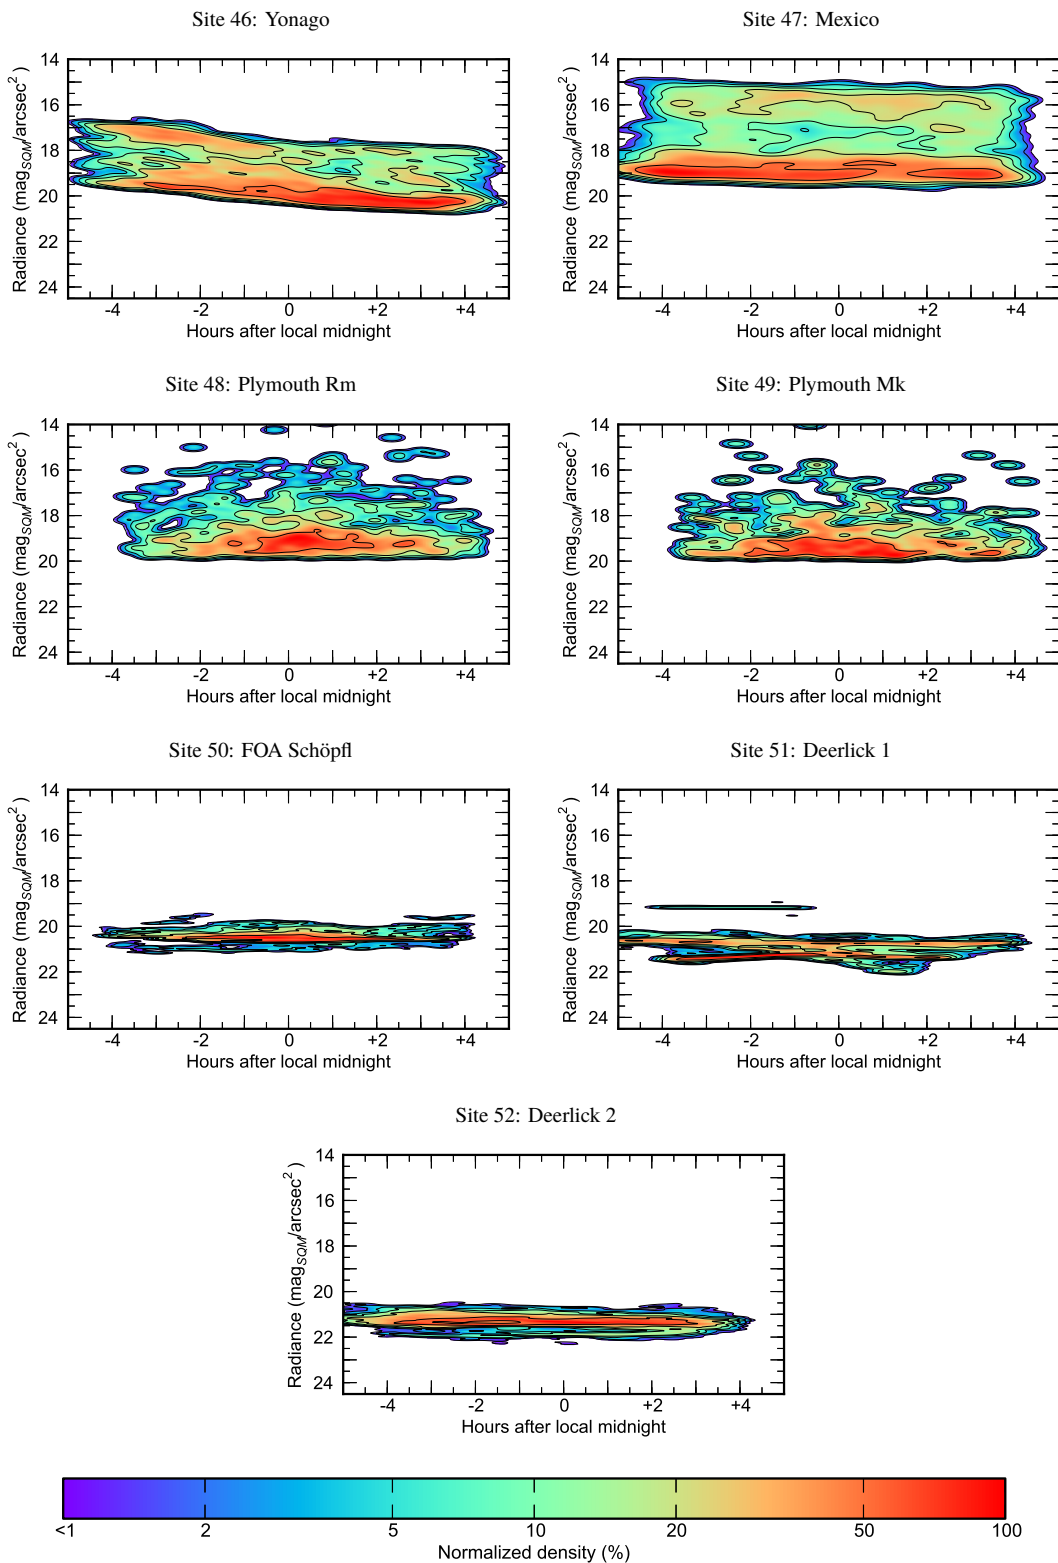

**Supplemental Figure S9: Comparison of the change in the artificial sky radiance from 22:00 to midnight on a linear scale**

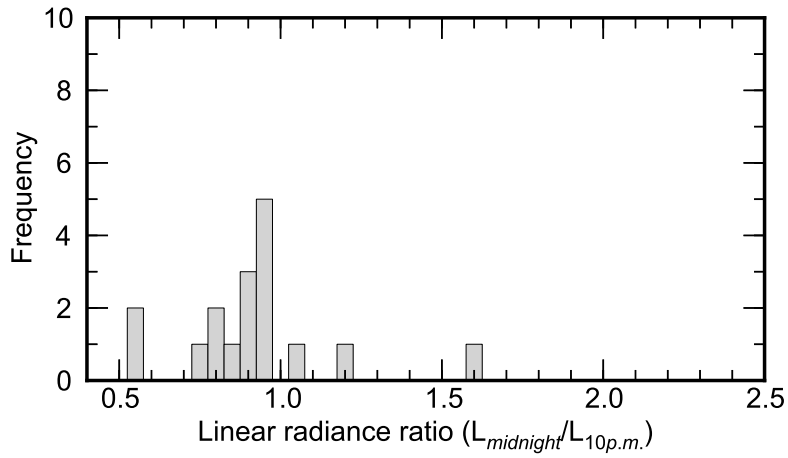

**Supplemental Figure S10: Comparison of the change in the artificial sky radiance from midnight to 02:00 on a linear scale**

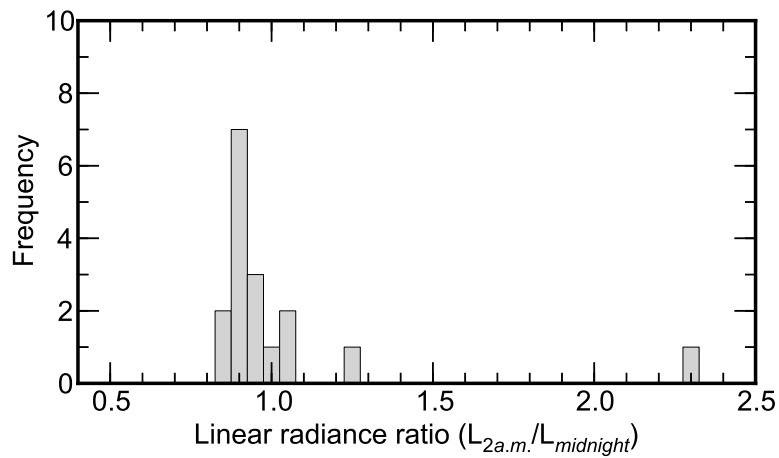

Supplement: srep08409-s1.pdf [file srep08409-s1.pdf]
